# Supplementary material for: Recent Antarctic ice mass loss from radar interferometry and regional climate modelling
Source: Springer Nature journal article supplement (doi:10.1038/ngeo102), 2008-01-13
Supplement: 41561_2008_BFngeo102_MOESM183_ESM.pdf [file 41561_2008_BFngeo102_MOESM183_ESM.pdf]

## Supplementary Material

**Table S1:** Glacier mass budget organized by basins A to K' as in ref. 20. Sectors corresponding to unnamed glaciers were named after a bay or an ice shelf. Area, drainage basin in million square km. A, snow accumulation in Gigatons of water per year (Gt/yr). F, solid ice flux in Gt/yr and uncertainty in flux  $\sigma$  calculated from the error in ice velocity,  $\delta V$ , ice thickness,  $\delta H$ , the center ice thickness, H, and the velocity, V as,  $\sigma / F = \delta H/H + \delta V/V$ .  $\Delta H$ , firn depth correction in m (ISR indicates ice sounding radar thickness instead). Mass balance is A minus F. Year, year of velocity data. GL, grounding line determined from InSAR or MOA<sup>13</sup>. Ice fluxes for F'E are from ref. 23. Ice thickness for SUL (ref. S1), for FLE, PIG, TWG, HSK<sup>10</sup>, and BEDMAP for SUF.

LAB = Larsen A and B glaciers<sup>6</sup>. FLE = Fleming and other glaciers<sup>8</sup>. RYM, ENG = Rymill and English coasts. LID = Lidke and other glaciers. BER, FER = Berg and Ferrigno ice streams. VIS, ABB, COS, GET, SUL = Glaciers flowing into Venable, Abbot, Cosgrove, Getz and Sulzberger ice shelves. PIG, TWG, HSK, HUL, LAN = Pine Island, Thwaites, Haynes, Pope, Smith, Kohler, Hull and Land glaciers. MER, WHI, KAM, BIN, MAC, ECH = Mercer, Whillans, Kamb, Bindshadler, MacAyeal and Echelmeyer ice streams. BEA, NIM, BYR, MUL, DAV, REN = Beardmore, Nimrod, Byrd, Mullock, David and Rennick glaciers. COO, MOS = Glaciers flowing into Cook and Moscow University ice shelves. NIN, MER, DIB, FRO, TOT, DEN, PHI, LAM, SCY = Ninnis, Mertz, Dibble, Frost, Totten, Denman, Philippi and others, Lambert and others, and Scylla and other glaciers. BUD, RAG, AST = Budd, Princess Ragnhild and Princess Astrid coasts. AME = American Highland glaciers. ROB, RAY, SHI = Robert, Rayner and Thyer, Shirase glaciers. JUT = Jutulstraumen. JEL, EKS, RIL = Glaciers flowing into Jelbart, Ekstrom, and Riiser-Larsen ice shelves. VES, STA = Veststraumen, Stancomb-Wills glaciers. COA = Coats Land. BAI, SLE, REC, FOU, MOL, INS, RUT, EVA = Bailey, Slessor, Recovery, Foundation, Moller, Institute, Rutford, Evans ice streams. CAR = Carlson Inlet. ORV, WIL = Orville and Wilkins coasts.

Flux gates are wider than in ref. 12 because of the availability of additional ice velocity and thickness data across larger sectors of ice.

### Supplementary References

S1. B. Luyendyk, D. Wilson, *Surface elevation and ice thickness, Western Marie Byrd Land, Antarctica*, Boulder, CO, USA: National Snow and Ice Data Center (2003).

| Basin            | Area             | A           | F          | $\sigma$   | V         | H   | $\delta V$ | $\delta H$ | $\Delta H$ | A - F | Year       | GL         |
|------------------|------------------|-------------|------------|------------|-----------|-----|------------|------------|------------|-------|------------|------------|
|                  | Mkm <sup>2</sup> | Gt/yr       | Gt/yr      |            | km/yr     | km  |            |            | m          | Gt/yr |            |            |
| I"J              | WIL              | 11          | 8.1        | 9.4        | 2         | 0.4 | 0.6        | 20         | 80         | 16    | -1         | 2000 InSAR |
| II"              | LAB              | 6           | 11.0       | 36.1       | 8         | 2.0 | 0.6        | 20         | 120        | 12    | -25        | 2004 InSAR |
| II"              | FLE              | 7           | 3.7        | 6.2        | 0         | 2.0 | 0.4        | 10         | 10         | ISR   | -3         | 2000 ISR   |
| H'I              | RYM              | 17          | 10.6       | 12.9       | 2         | 0.4 | 0.8        | 20         | 80         | 6     | -2         | 1994 InSAR |
| H'I              | ENG              | 54          | 39.2       | 31.6       | 5         | 0.4 | 0.9        | 20         | 100        | 15    | 8          | 1996 InSAR |
| H'I              | LID              | 17          | 16.0       | 23.3       | 5         | 0.4 | 0.8        | 50         | 80         | 17    | -7         | 1996 InSAR |
| H'I              | BER              | 5           | 5.5        | 10.1       | 1         | 1.2 | 1.2        | 50         | 120        | 18    | -5         | 1996 InSAR |
| <b>Peninsula</b> |                  | <b>116</b>  | <b>94</b>  | <b>130</b> | <b>11</b> |     |            |            |            |       | <b>-36</b> |            |
| HH'              | FER              | 14          | 12.7       | 25.8       | 3         | 1.7 | 1.5        | 50         | 120        | 18    | -13        | 1992 InSAR |
| HH'              | VEN              | 14          | 13.4       | 21.0       | 3         | 0.6 | 1.0        | 50         | 80         | 17    | -8         | 1996 InSAR |
| HH'              | ABO              | 19          | 18.7       | 31.7       | 9         | 0.3 | 0.8        | 50         | 80         | 17    | -14        | 1992 InSAR |
| HH'              | COS              | 9           | 6.3        | 7.5        | 3         | 0.2 | 1.5        | 50         | 80         | 16    | -1         | 1992 InSAR |
| GH               | PIG              | 164         | 61.3       | 84.9       | 1         | 2.5 | 1.1        | 20         | 10         | ISR   | -24        | 2000 ISR   |
| GH               | THW              | 182         | 75.0       | 97.1       | 2         | 2.0 | 1.1        | 20         | 10         | ISR   | -22        | 2000 ISR   |
| GH               | INT              | 11          | 8.9        | 7.9        | 0         | 0.5 | 1.0        | 20         | 10         | ISR   | 1          | 1996 ISR   |
| GH               | HSK              | 37          | 31.4       | 47.2       | 3         | 0.8 | 1.5        | 50         | 10         | ISR   | -16        | 2000 ISR   |
| F'G              | GET              | 92          | 85.8       | 97.8       | 18        | 0.5 | 0.9        | 50         | 80         | 19    | -11        | 1996 InSAR |
| F'G              | HUL              | 14          | 12.7       | 15.8       | 2         | 1.1 | 1.7        | 50         | 80         | 19    | -4         | 1996 InSAR |
| F'G              | LAN              | 13          | 9.9        | 14.2       | 2         | 1.0 | 1.3        | 50         | 80         | 18    | -4         | 1996 InSAR |
| E'F'             | SUL              | 34          | 14.3       | 7.8        | 0         | 0.3 | 0.9        | 10         | 10         | ISR   | 7          | 2000 ISR   |
| E'F'             | WHI              | 232         | 35.1       | 30.3       | 1         | 0.5 | 0.6        | 10         | 10         | ISR   | 5          | 1997 ISR   |
| E'F'             | KAM              | 153         | 18.3       | 0.5        | 0         | 0.0 | 0.6        | 10         | 10         | ISR   | 18         | 1997 ISR   |
| E'F'             | BIN              | 140         | 16.9       | 15.3       | 1         | 0.3 | 0.6        | 10         | 10         | ISR   | 2          | 1997 ISR   |
| E'F'             | MAC              | 175         | 22.3       | 24.4       | 1         | 0.3 | 0.6        | 10         | 10         | ISR   | -2         | 1997 ISR   |
| E'F'             | ECH              | 17          | 3.4        | 1.5        | 0         | 0.3 | 0.6        | 10         | 10         | ISR   | 2          | 1997 ISR   |
| JJ"              | ORV              | 36          | 11.0       | 11.6       | 3         | 0.1 | 0.6        | 10         | 80         | 16    | 0          | 2000 InSAR |
| JJ"              | EVA              | 109         | 44.4       | 44.0       | 4         | 0.6 | 1.5        | 20         | 80         | 19    | 0          | 1996 InSAR |
| JJ"              | CAR              | 9           | 3.6        | 0.5        | 1         | 0.1 | 1.8        | 25         | 80         | 22    | 1          | 1992 InSAR |
| JJ"              | RUT              | 53          | 18.5       | 19.1       | 3         | 0.4 | 2.0        | 50         | 80         | 20    | 0          | 1992 InSAR |
| JJ"              | INS              | 149         | 21.9       | 25.6       | 3         | 0.4 | 1.3        | 20         | 80         | 19    | -3         | 1997 Moa   |
| JJ"              | MOL              | 62          | 7.4        | 6.5        | 1         | 0.1 | 1.1        | 10         | 80         | 19    | 1          | 1997 Moa   |
| JJ"              | FOU              | 515         | 35.0       | 38.1       | 3         | 0.6 | 2.3        | 20         | 80         | 14    | -1         | 1997 Moa   |
| <b>West</b>      |                  | <b>2251</b> | <b>588</b> | <b>676</b> | <b>22</b> |     |            |            |            |       | <b>-88</b> |            |
| J"K              | SUP              | 133         | 7.0        | 3.9        | 1         | 0.1 | 1.6        | 20         | 80         | ISR   | 3          | 1997 ISR   |
| J"K              | REC              | 996         | 48.6       | 39.2       | 3         | 0.8 | 1.8        | 20         | 80         | 15    | 9          | 1997 Moa   |
| J"K              | SLE              | 499         | 30.6       | 26.1       | 3         | 0.5 | 1.3        | 20         | 80         | 16    | 5          | 1997 InSAR |
| J"K              | BAI              | 71          | 6.6        | 5.9        | 1         | 0.2 | 2.0        | 20         | 80         | 17    | 1          | 1997 InSAR |
| D'E              | DAV              | 214         | 10.8       | 14.6       | 2         | 0.5 | 2.7        | 50         | 100        | 14    | -4         | 1996 InSAR |
| D'E              | REN              | 53          | 9.4        | 7.4        | 3         | 0.2 | 1.5        | 50         | 100        | 14    | 2          | 2000 InSAR |
| DD'              | COO              | 243         | 32.2       | 37.0       | 5         | 1.8 | 1.0        | 50         | 100        | 17    | -5         | 2000 InSAR |
| DD'              | NIN              | 205         | 25.1       | 25.3       | 3         | 0.8 | 1.5        | 50         | 100        | 17    | 0          | 1996 InSAR |
| DD'              | MER              | 82          | 19.9       | 18.5       | 2         | 0.8 | 1.8        | 50         | 100        | 17    | 1          | 1996 InSAR |
| DD'              | DIB              | 33          | 15.1       | 13.8       | 2         | 0.8 | 1.5        | 50         | 100        | 17    | 1          | 1996 InSAR |
| C'D              | FRO              | 136         | 32.6       | 36.1       | 3         | 1.7 | 2.0        | 50         | 100        | 16    | -4         | 1996 InSAR |
| C'D              | HOL              | 49          | 24.5       | 20.6       | 2         | 1.5 | 2.0        | 50         | 100        | 16    | 4          | 1996 InSAR |
| C'D              | MOS              | 181         | 35.9       | 41.1       | 7         | 0.4 | 2.5        | 50         | 100        | 16    | -6         | 1996 InSAR |
| C'D              | TOT              | 570         | 67.9       | 73.6       | 8         | 0.8 | 2.0        | 50         | 100        | 17    | -6         | 1996 InSAR |
| C'D              | BUD              | 117         | 37.5       | 35.3       | 7         | 0.5 | 1.0        | 50         | 100        | 13    | 3          | 1996 InSAR |
| CC'              | DEN              | 226         | 40.7       | 43.6       | 3         | 1.5 | 2.5        | 50         | 100        | 14    | -3         | 1996 InSAR |
| CC'              | PHI              | 208         | 40.0       | 43.7       | 6         | 0.5 | 0.8        | 20         | 80         | 14    | -3         | 2000 InSAR |
| BC               | LAM              | 957         | 55.8       | 56.7       | 3         | 0.7 | 3.0        | 20         | 100        | 13    | 1          | 1996 InSAR |
| BC               | SCY              | 42          | 6.4        | 8.5        | 2         | 0.2 | 1.6        | 20         | 80         | 12    | -2         | 2000 InSAR |
| BC               | AME              | 198         | 11.3       | 12.3       | 2         | 0.3 | 1.2        | 20         | 80         | 11    | -1         | 2000 InSAR |
| A'B              | ROB              | 51          | 10.8       | 8.0        | 1         | 0.8 | 1.7        | 20         | 80         | 18    | 3          | 2000 InSAR |
| A'B              | RAY              | 104         | 14.2       | 10.7       | 1         | 1.0 | 1.0        | 20         | 80         | 12    | 3          | 2000 InSAR |
| A'B              | SHI              | 199         | 14.3       | 21.1       | 1         | 2.2 | 1.3        | 20         | 80         | 15    | -7         | 1996 InSAR |
| AA'              | QML              | 615         | 59.9       | 60.1       | 7         | 0.2 | 0.7        | 20         | 80         | 13    | 1          | 2000 InSAR |
| K'A              | JUT              | 123         | 14.1       | 14.2       | 1         | 0.7 | 2.0        | 20         | 80         | 15    | 0          | 1994 InSAR |
| K'A              | JEL              | 19          | 8.6        | 9.6        | 1         | 0.3 | 1.0        | 20         | 80         | 16    | -1         | 2000 InSAR |
| K'A              | EKS              | 17          | 3.8        | 3.9        | 1         | 0.1 | 0.9        | 20         | 80         | 16    | 0          | 2000 InSAR |
| KK'              | RIL              | 51          | 9.3        | 11.1       | 3         | 0.1 | 0.7        | 20         | 80         | 15    | -1         | 2000 InSAR |
| KK'              | VES              | 39          | 8.1        | 7.7        | 1         | 0.2 | 1.2        | 20         | 80         | 14    | 0          | 1996 InSAR |
| KK'              | STA              | 108         | 16.3       | 17.5       | 2         | 0.7 | 1.4        | 20         | 80         | 17    | -1         | 1996 InSAR |
| KK'              | COA              | 19          | 8.2        | 8.3        | 2         | 0.2 | 0.8        | 20         | 80         | 17    | 0          | 2000 InSAR |
| E E'             | BYR              | 997         | 39.1       | 30.4       | 4         | 0.8 | 2.0        | 20         | 200        | 12    | 8          | 1997 Moa   |
| E E'             | MUL              | 119         | 6.1        | 5.7        | 1         | 0.4 | 1.0        | 20         | 80         | 13    | 0          | 1997 Moa   |
| E E'             | BEA              | 102         | 5.7        | 6.3        | 1         | 0.3 | 1.3        | 20         | 80         | 13    | -1         | 1997 Moa   |
| E E'             | NIM              | 222         | 9.9        | 6.9        | 1         | 0.4 | 2.4        | 20         | 100        | 6     | 3          | 1997 Moa   |
| <b>East</b>      |                  | <b>7998</b> | <b>786</b> | <b>785</b> | <b>20</b> |     |            |            |            |       | <b>1</b>   |            |
